# Supplementary material
Source: Springer Nature journal article supplement (https://www.springermedizin.de/resource/supplementary/13046_2009_242_MOESM4_ESM.pdf/9661622)
Supplement: MOESM4 [file 9661622]

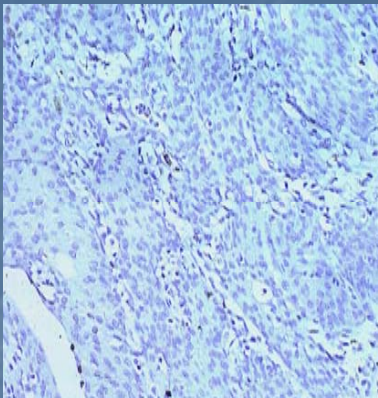

Figure4A:normal-  
Saline group  
TUNEL×100

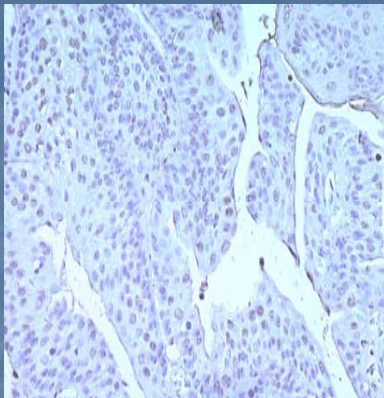

Figure4B:empty  
plasmid baby  
Bifidobacterium group  
TUNEL×100

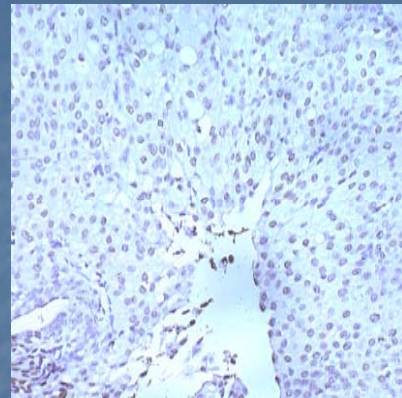

Figure4C: Recombinant  
Plasmidbaby-  
Bifidobacterium group  
TUNEL×100
